# Supplementary material for: External environment sensitive circularly polarized luminescence properties of a chiral boron difluoride complex
Source: Royal Society of Chemistry journal article supplement (doi:10.1039/d2ra07386b), 2022-01-01
Supplement: d2ra07386b1.pdf [file d2ra07386b1.pdf]

## Supporting Information

### External environment sensitive circularly polarized luminescence properties of chiral boron difluoride complex

Masahiro Ikeshita,<sup>\*a</sup> Hongxi He,<sup>a</sup> Maho Kitahara,<sup>b</sup> Yoshitane Imai<sup>\*b</sup> and Takashi Tsuno<sup>\*a</sup>

<sup>a</sup> Department of Applied Molecular Chemistry, College of Industrial Technology, Nihon University, Narashino, Chiba 275-8575, Japan

<sup>b</sup> Department of Applied Chemistry, Faculty of Science and Engineering, Kindai University 3-4-1 Kowakae, Higashi-Osaka, Osaka 577-8502, Japan

#### Table of Contents

1. Instrumentation and Materials
2. Synthetic Procedures and Characterization
3. Single Crystal X-ray Diffraction Analysis
4. Photophysical Properties
5. Computational Details
6. Cartesian Coordinates (in Å)
7. References

## 1. Instrumentation and Materials

### Instruments

Melting points were measured by a ATM-01 melting temperature measurement device (AS ONE Corporation). IR spectra were acquired with a JASCO FT/IR4100ST spectrometer. High-resolution mass spectrometry was recorded on Bruker micrOTOF II spectrometer.  $^1\text{H}$  and  $^{13}\text{C}$  NMR spectra were recorded on Bruker Avance III 500 spectrometers, TMS as internal standard. Elemental analyses were performed on a YANAKO MT-5 at A-Rabbit-Science Japan Co., Ltd. UV-vis absorption spectra were obtained on a SHIMADZU UV-1900i spectrophotometer. CD spectra were recorded on a JASCO J-720 spectropolarimeter. Emission spectra were obtained on a JASCO FP-6500 spectrometer. CPL spectra were obtained at room temperature using a JASCO CPL-300 spectrofluoropolarimeter. Optical rotation was measured on a Jasco DIP-370 digital polarimeter.

### Materials

4-(Diethylamino)salicylaldehyde (TCI), (*R*)- and (*S*)-1-phenylethylamine (Kanto Chemical), salicylaldehyde (Kanto Chemical), boron trifluoride - ethyl ether complex (TCI), triethylamine (Fujifilm Wako) and dry dichloroethane (Kanto Chemical) were obtained from commercial sources and were used without further purification. The solid-state samples were prepared according to the standard procedure for obtaining glassy KBr matrices.<sup>S1</sup>

## 2. Synthetic Procedures and Characterization

### General procedure for ligands

The ligands were prepared by condensation of corresponding aldehyde with (*R*)/(*S*)-1-phenylethylamine in boiling ethanol. The spectral data of **2b** were corresponded with published papers.<sup>S2</sup> The physical properties and spectroscopic data of the ligands (*R*)/(*S*)-**2a** and **2b** are as follows.

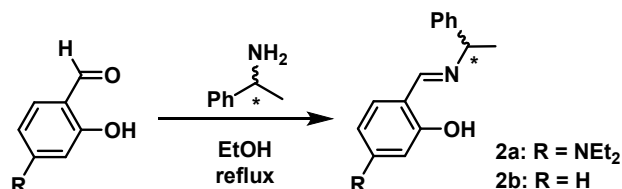

**(*R*)/(*S*)-2a:** Brown liquid (98%); IR (KBr):  $\nu = 3464$  (O-H),  $1620\text{ cm}^{-1}$  (N=C); <sup>1</sup>H NMR (500 MHz, CDCl<sub>3</sub>)  $\delta = 13.96$  (br s, 1H), 8.09 (br s, 1H), 7.36–7.31 (m, 4H), 7.25–7.22 (m, 1H), 6.98 (d,  $J = 8.5$  Hz, 1H), 6.15 (dd,  $J = 8.5, 2.3$  Hz, 1H), 6.12 (d,  $J = 2.3$  Hz, 1H), 4.48 (q,  $J = 6.7$  Hz, 1H), 3.36 (q,  $J = 7.0$  Hz, 4H), 1.59 (d,  $J = 6.7$  Hz, 3H), 1.17 ppm (t,  $J = 7.0$  Hz, 6H); <sup>13</sup>C NMR (125 MHz, CDCl<sub>3</sub>)  $\delta = 164.7, 161.4, 150.8, 144.1, 132.4, 128.0, 126.4, 125.8, 107.9, 102.6, 97.6, 66.0, 43.9, 24.6, 12.1$  ppm; Anal. calcd for C<sub>19</sub>H<sub>24</sub>N<sub>2</sub>O: C, 76.99; H, 8.16; N, 9.45. Found: C, 76.98; H, 8.15; N, 9.43. (*R*)-**2a**:  $[\alpha]_{\text{D}}^{25} = -247$  (c 0.001, CHCl<sub>3</sub>), (*S*)-**2a**:  $[\alpha]_{\text{D}}^{25} = +250$  (c 0.001, CHCl<sub>3</sub>).

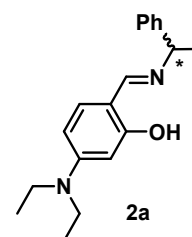

**(*R*)/(*S*)-2b**<sup>S2</sup>: Yellow solid (98%); <sup>1</sup>H NMR (500 MHz, CDCl<sub>3</sub>)  $\delta = 13.53$  (s, 1H), 8.42 (s, 1H), 7.39–7.25 (m, 7H), 7.00 (d,  $J = 8.2$  Hz, 1H), 6.89 (t,  $J = 7.5$  Hz, 1H), 4.58 (q,  $J = 6.7$  Hz, 1H), 1.65 (d,  $J = 6.7$  Hz, 3H).

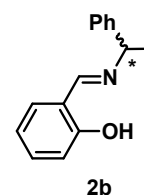

## General procedure for boron complexes

A solution of corresponding chiral ligands (1 equiv.) in 1,2-dichloroethane was added triethylamine (4 equiv.) and boron trifluoride - ethyl ether complex (4 equiv.) The mixture was refluxed under nitrogen atmosphere for overnight. After that, the mixture was poured into water, and was extracted with dichloromethane, followed by drying over anhydrous  $\text{MgSO}_4$ . After the removal of the solvent, the crude product was purified by column chromatography ( $\text{SiO}_2$ ) using dichloromethane as the eluent. After recrystallization from  $\text{CH}_2\text{Cl}_2/\text{EtOH}$ , (*R*)/(*S*)-**1a** and **1b** were obtained in moderate yields. The spectral data of **1b** were corresponded with published papers.<sup>S2</sup> The physical properties and spectroscopic data of the ligands (*R*)/(*S*)-**1a** and **1b** are as follows.

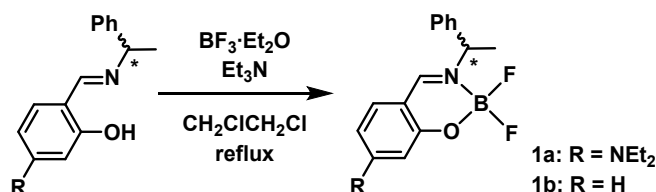

**(R)/(S)-1a:** Colorless crystals (61%); m.p. 174–175 °C; IR (KBr):  $\nu = 1628 \text{ cm}^{-1}$  (N=C); <sup>1</sup>H NMR (500 MHz,  $\text{CDCl}_3$ )  $\delta = 7.64$  (br, 1H), 7.46–7.44 (m, 2H), 7.41–7.37 (m, 2H), 7.34–7.31 (m, 1H), 6.97 (d,  $J = 8.9 \text{ Hz}$ , 1H), 6.23 (dd,  $J = 8.9, 2.4 \text{ Hz}$ , 1H), 6.20 (d,  $J = 2.4 \text{ Hz}$ , 1H), 5.29 (q,  $J = 7.0 \text{ Hz}$ , 1H), 3.39 (q,  $J = 7.1 \text{ Hz}$ , 4H), 1.79 (d,  $J = 7.0 \text{ Hz}$ , 3H), 1.19 (t,  $J = 7.1 \text{ Hz}$ , 6H) ppm; <sup>13</sup>C NMR (125 MHz,  $\text{CDCl}_3$ )  $\delta = 160.6, 159.0, 155.3, 140.2, 133.0, 128.6, 127.9, 127.6, 105.8, 105.5, 97.8, 56.9, 44.8, 20.4, 12.4$  ppm; HRMS (APCI+):  $m/z$  [ $\text{M}$ ]<sup>+</sup> calcd for  $\text{C}_{19}\text{H}_{23}\text{N}_2\text{OBF}_2$ : 344.1869; found: 344.1840; Anal. calcd for  $\text{C}_{19}\text{H}_{23}\text{N}_2\text{OBF}_2$ : C, 66.30; H, 6.74; N, 8.14. Found: C, 66.02; H, 6.88; N, 8.18. (*R*)-**1a**:  $[\alpha]_{\text{D}}^{25} = +222$  (c 0.001,  $\text{CHCl}_3$ ), (*S*)-**1a**:  $[\alpha]_{\text{D}}^{25} = -226$  (c 0.001,  $\text{CHCl}_3$ ).

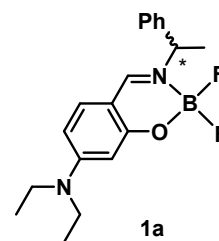

**(R)/(S)-1b<sup>S2</sup>:** Colorless crystals (77%); <sup>1</sup>H NMR (500 MHz,  $\text{CDCl}_3$ )  $\delta = 8.0$  (br, 1H), 7.56 (ddd,  $J = 8.5, 7.2, 1.7 \text{ Hz}$ , 1H), 7.48–7.38 (m, 5H), 7.24 (dd,  $J = 7.8, 1.7$ , 1H), 7.10 (d,  $J = 8.5 \text{ Hz}$ , 1H), 6.90 (ddd,  $J = 7.8, 7.2, 0.9 \text{ Hz}$ , 1H), 5.48 (q,  $J = 7.0 \text{ Hz}$ , 1H), 1.87 (d,  $J = 7.0 \text{ Hz}$ , 3H) ppm.

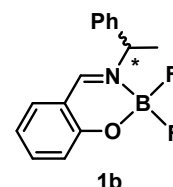

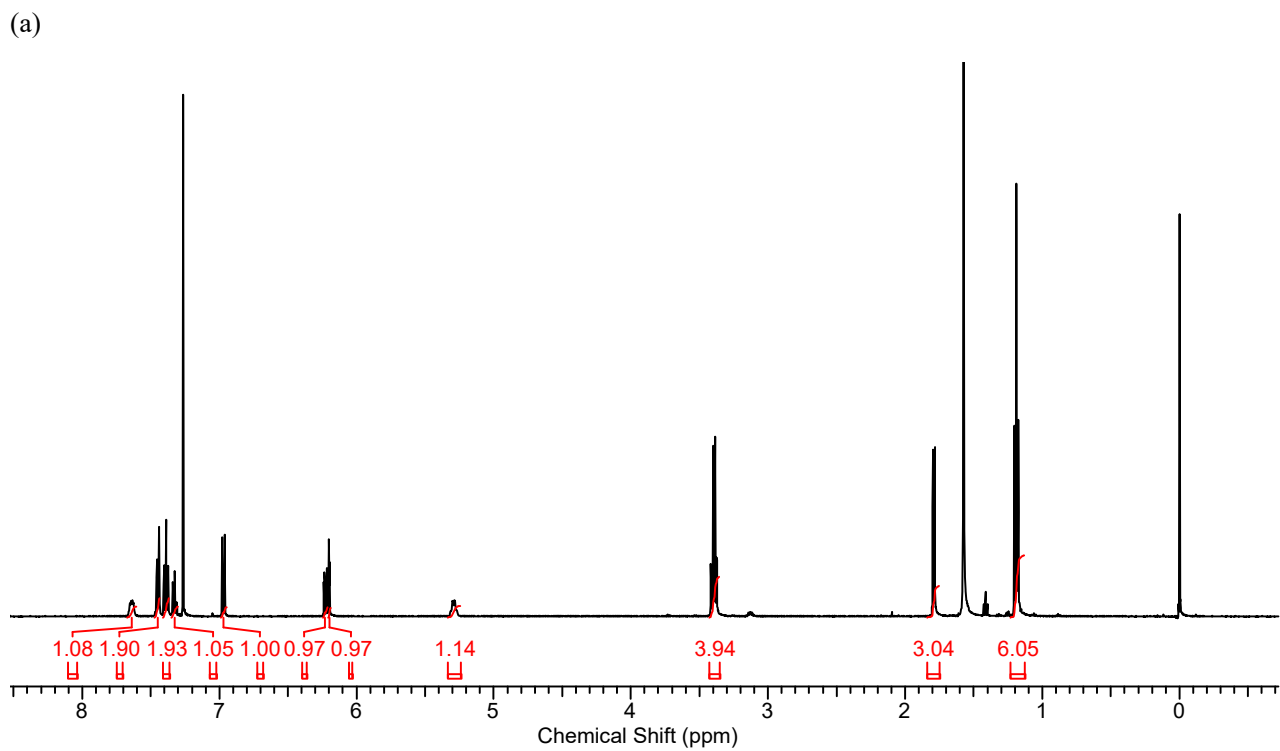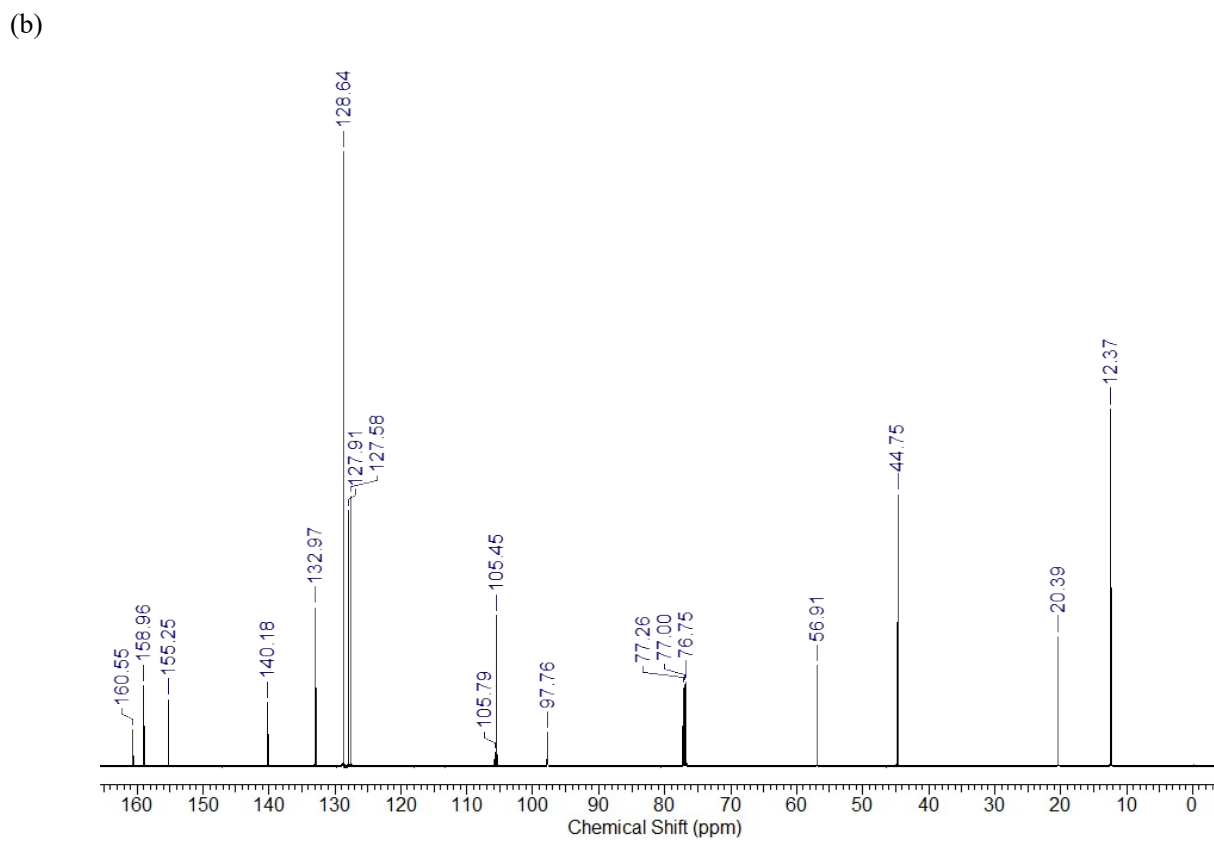

**Fig. S1** (a)  $^1\text{H}$  and (b)  $^{13}\text{C}$  NMR spectra of (*S*)-**1a** in  $\text{CDCl}_3$  (500 MHz, 298 K).

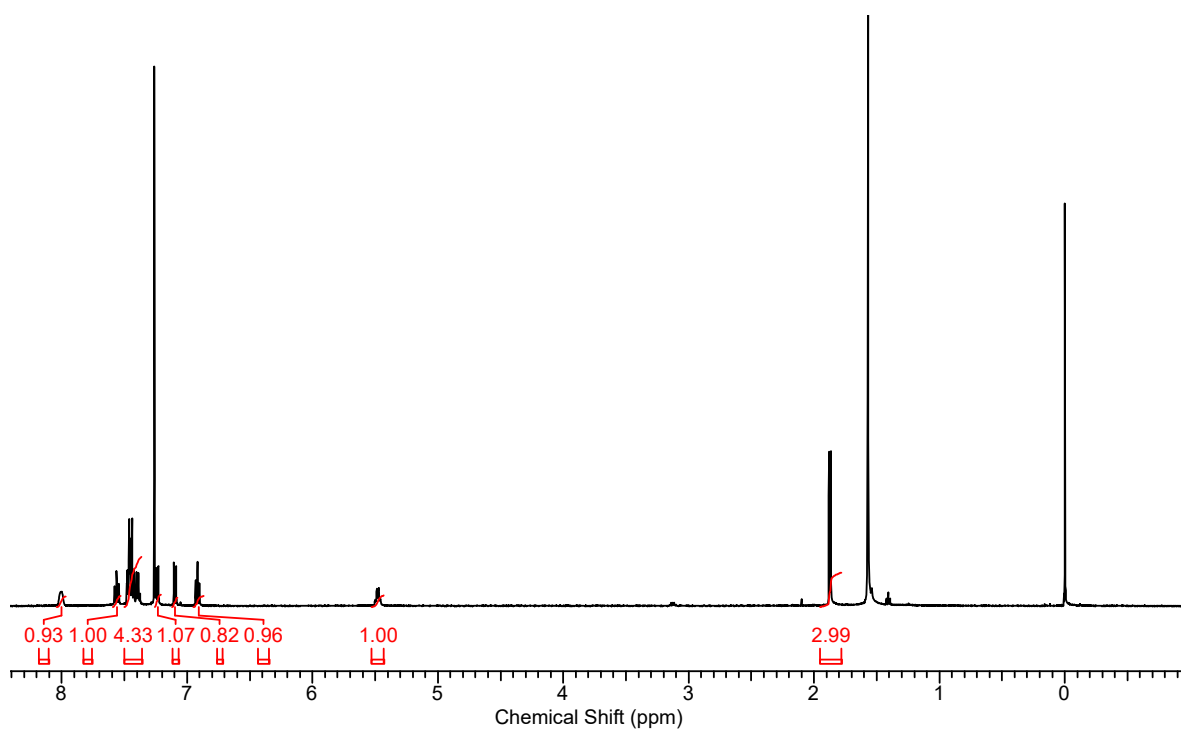

**Fig. S2**  $^1\text{H}$  NMR spectrum of (*S*)-**1b** in  $\text{CDCl}_3$  (500 MHz, 298 K).

(a)

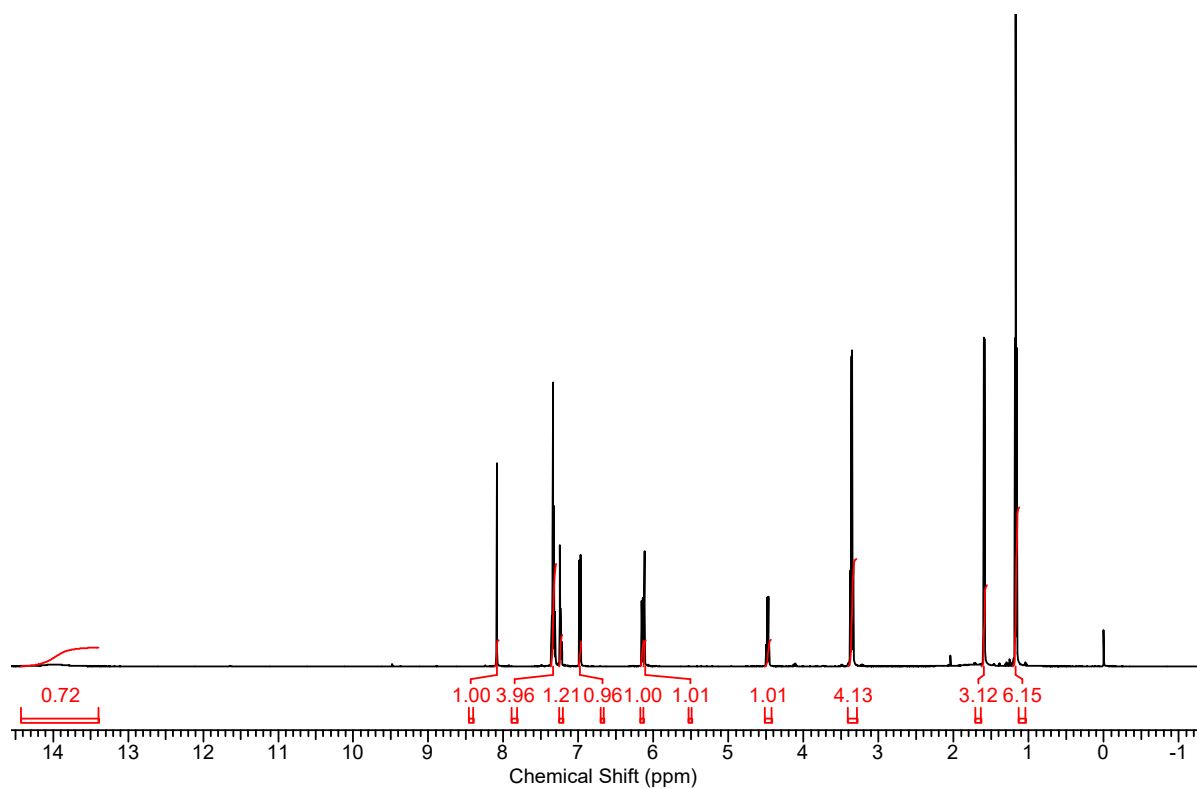

(b)

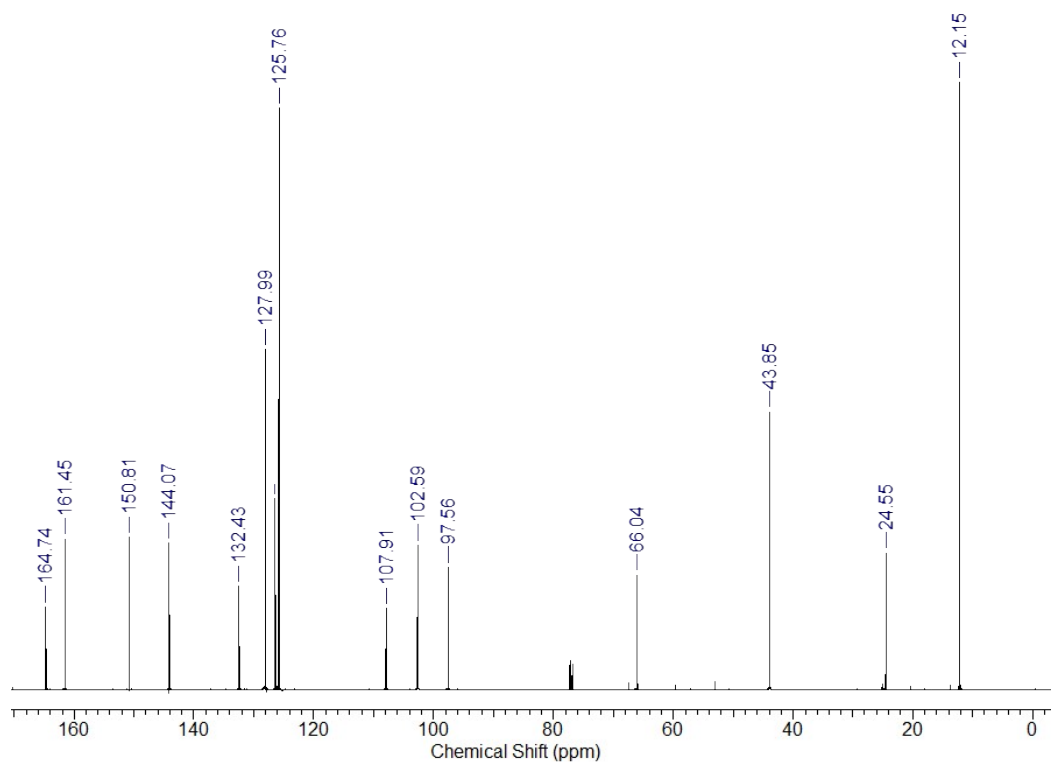

**Fig. S3** (a)  $^1\text{H}$  and (b)  $^{13}\text{C}$  NMR spectra of (*S*)-**2a** in  $\text{CDCl}_3$  (500 MHz, 298 K).

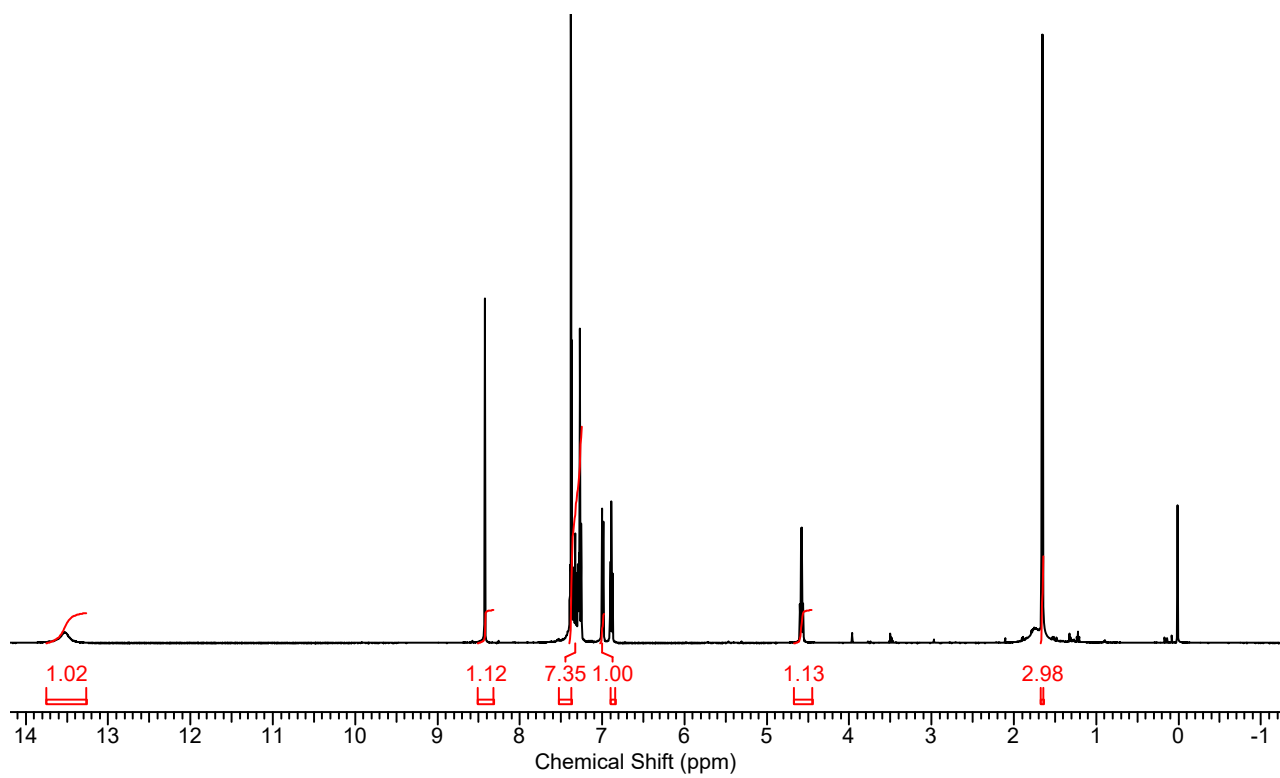

**Fig. S4**  $^1\text{H}$  NMR spectrum of *(S)*-**2b** in  $\text{CDCl}_3$  (500 MHz, 298 K).



### 3. Single Crystal X-ray Diffraction Analysis

Crystals suitable for XRD studies were analyzed using Rigaku XtaLAB mini2 benchtop X-ray crystallography system equipped with a Mo rotating-anode X-ray generator with monochromated Mo- $K_{\alpha}$  radiation ( $\lambda = 0.71073 \text{ \AA}$ ). The molecular structures and packings in crystals (*S*)-**1a** were solved by direct methods and refined using the full-matrix least-squares method. In subsequent refinements, the function  $\Sigma\omega(F_o^2 - F_c^2)^2$  was minimized, where  $F_o$  and  $F_c$  are the observed and calculated structure factor amplitudes, respectively. The positions of non-hydrogen atoms were found from difference Fourier electron density maps and refined anisotropically. All calculations were performed using the Crystal Structure crystallographic or CrysAlisPro program software package, and illustrations were drawn by using ORTEP.

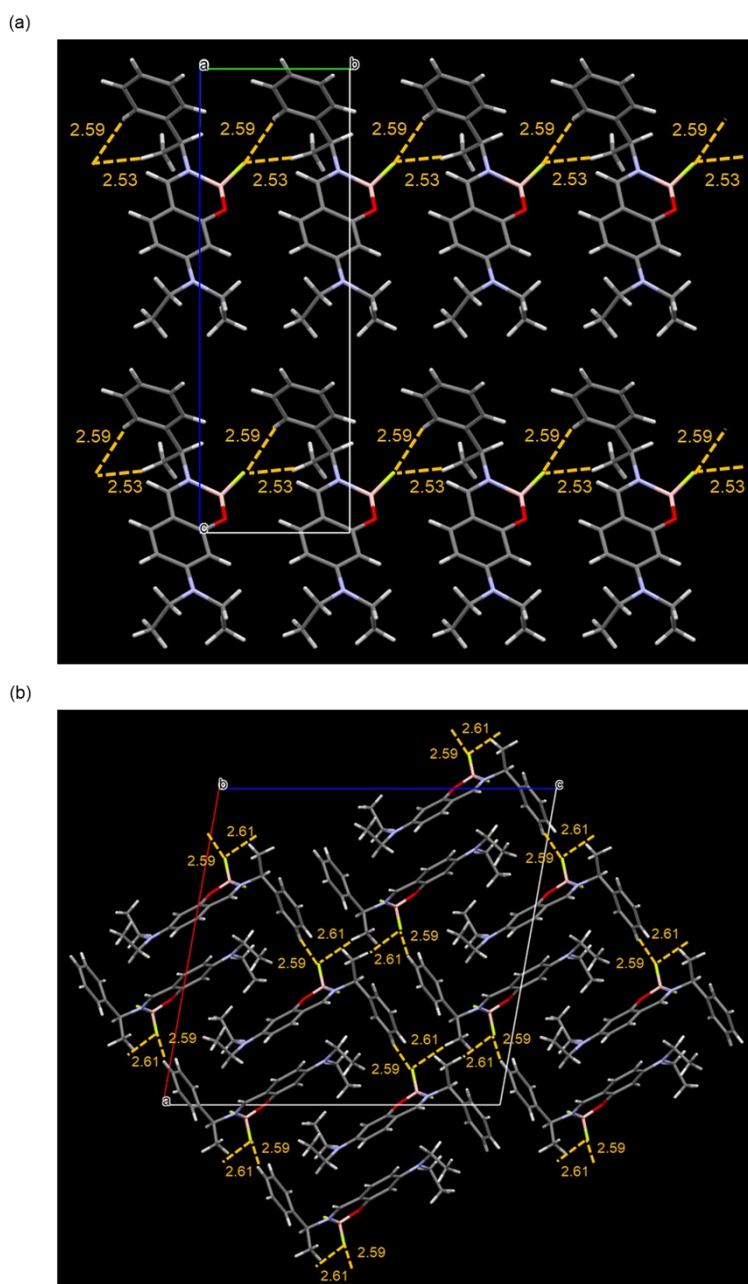

**Fig. S5** Packing structure of (*S*)-**1a**. (a) The *a*-axis and (b) the *b*-axis projections showing H $\cdots$ F (orange broken lines) interactions.

**Table S1.** Crystal data and structural refinement details for complexes (S)-**1a**.

| (S)- <b>1a</b>                                   |                                                    |
|--------------------------------------------------|----------------------------------------------------|
| Formula                                          | C <sub>19</sub> H <sub>23</sub> BF <sub>2</sub> NO |
| $M_F$                                            | 344.20                                             |
| $T$ [K]                                          | 113.15                                             |
| Crystal color, habit                             | colorless, plate                                   |
| Crystal size [mm]                                | 0.456×0.125×0.058                                  |
| Crystal system                                   | monoclinic                                         |
| Space group                                      | $P2_1$ (#4)                                        |
| $a$ [Å]                                          | 19.6617(11)                                        |
| $b$ [Å]                                          | 6.5542(4)                                          |
| $c$ [Å]                                          | 20.6217(11)                                        |
| $\alpha$ [°]                                     | 90                                                 |
| $\beta$ [°]                                      | 100.086(5)                                         |
| $\gamma$ [°]                                     | 90                                                 |
| $V$ [Å <sup>3</sup> ]                            | 2616.4(3)                                          |
| $Z$                                              | 6                                                  |
| $D_{\text{calcd}}$ [g cm <sup>-3</sup> ]         | 1.311                                              |
| Abs coeff (mm <sup>-1</sup> )                    | 0.095                                              |
| Abs correct                                      | multi-scan                                         |
| Transmiss max/min                                | 0.999/0.961                                        |
| $F(000)$                                         | 1092                                               |
| $\theta$ range (°)                               | 4.012–61.002                                       |
| Rflns/unique                                     | 53335/15069                                        |
| $R_{\text{int}}$                                 | 0.0466                                             |
| Data/params                                      | 15069/1/685                                        |
| Largest diff. peak and hole (e Å <sup>-3</sup> ) | 0.24/–0.20                                         |
| $R_1$ ( $I > 2\sigma(I)$ ) <sup>[a]</sup>        | 0.0461                                             |
| $wR_2$ (all reflections) <sup>[b]</sup>          | 0.1213                                             |
| Goodness of fit                                  | 1.002                                              |
| CCDC No.                                         | 2205119                                            |

[a]  $R_1 = \Sigma(|F_o| - |F_c|) / \Sigma(|F_o|)$ . [b]  $wR_2 = [\Sigma(w(F_o^2 - F_c^2)^2) / \Sigma w F_o^2]^{1/2}$ .

#### 4. Photophysical Properties

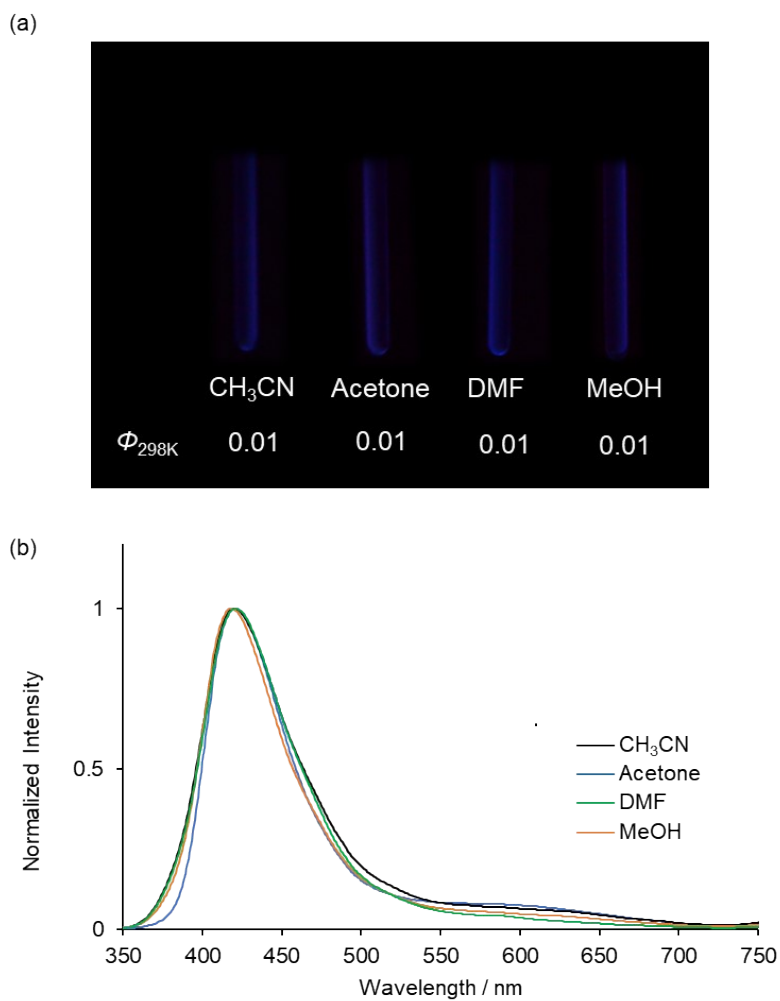

**Fig. S6** (a) Photographs and (b) normalized emission spectra of  $2.0 \times 10^{-4}$  M solutions of (*S*)-**1a** in various polar organic solvents at 298 K.

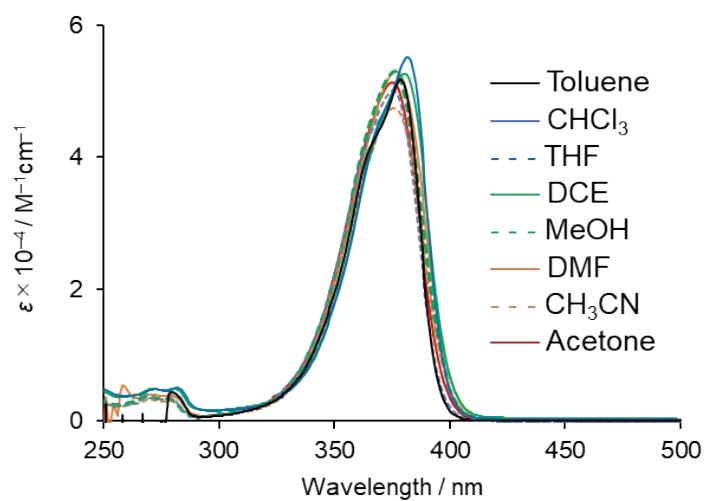

**Fig. S7** UV-vis spectra of  $2.0 \times 10^{-4}$  M solutions of (*S*)-**1a** in various polar organic solvents at 298 K.

**Table S2.** Photophysical data for complexes (*S*)-**1a**.<sup>[a]</sup>

| Solvents           | $\lambda_{\text{abs}}$ [nm] | $\lambda_{\text{max}}$ [nm] <sup>[b]</sup> | $\phi$ <sup>[b,c]</sup> | CIE (x, y) <sup>[b]</sup> |
|--------------------|-----------------------------|--------------------------------------------|-------------------------|---------------------------|
| CH <sub>3</sub> CN | 279, 376                    | 420                                        | 0.01                    | 0.19, 0.12                |
| Acetone            | 375                         | 421                                        | 0.01                    | 0.20, 0.12                |
| DMF                | 279, 377                    | 421                                        | 0.01                    | 0.17, 0.09                |
| MeOH               | 278, 276                    | 418                                        | 0.01                    | 0.18, 0.10                |

[a] Data were obtained from a  $2.0 \times 10^{-4}$  M solution or crystals at 298 K. [b]  $\lambda_{\text{ex}} = 350$  nm. [c] Luminescent quantum efficiencies measured using the absolute method with an integrating sphere.

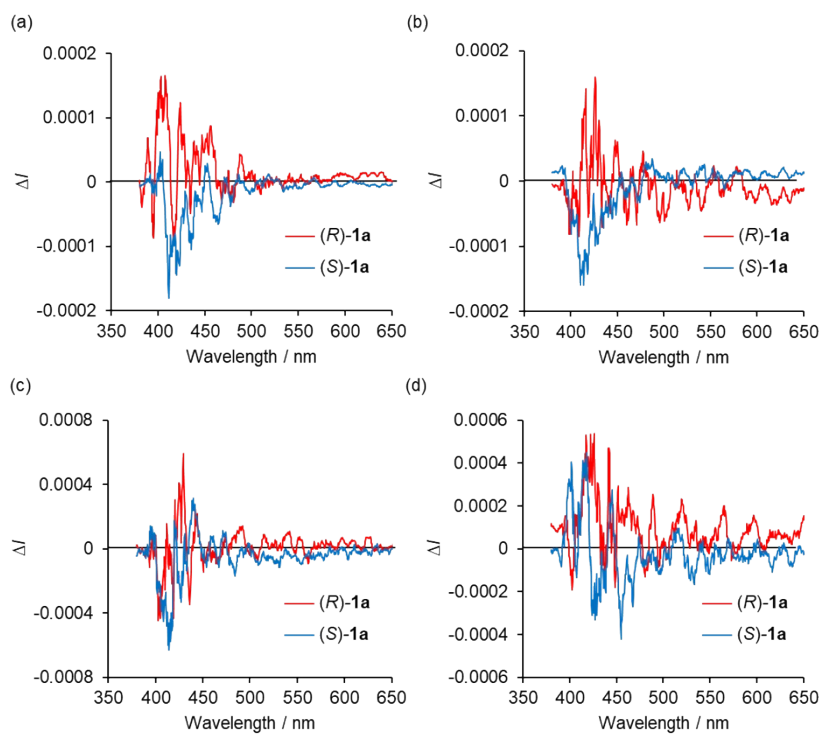

**Fig. S8** CPL spectra of (*R*)- and (*S*)-**1a** in (a) toluene, (b) CHCl<sub>3</sub>, (c) THF and (d) DCE ( $2.0 \times 10^{-4}$  M) at 298 K ( $\lambda_{\text{ex}} = 350$  nm).

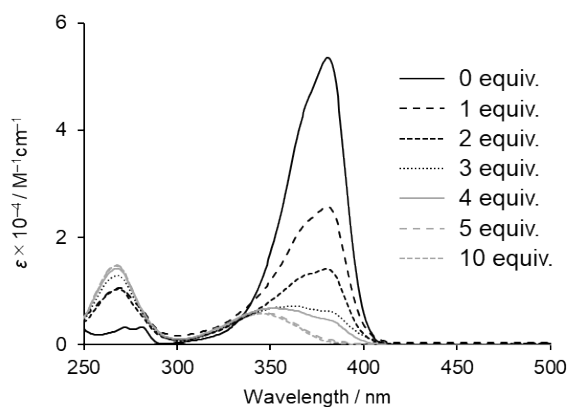

**Fig. S9** Changes in UV-vis spectra of  $2.0 \times 10^{-4}$  M solutions of **1a** in  $\text{CH}_2\text{Cl}_2$  as a function of equivalent of  $\text{CH}_3\text{SO}_3\text{H}$  at 298 K.

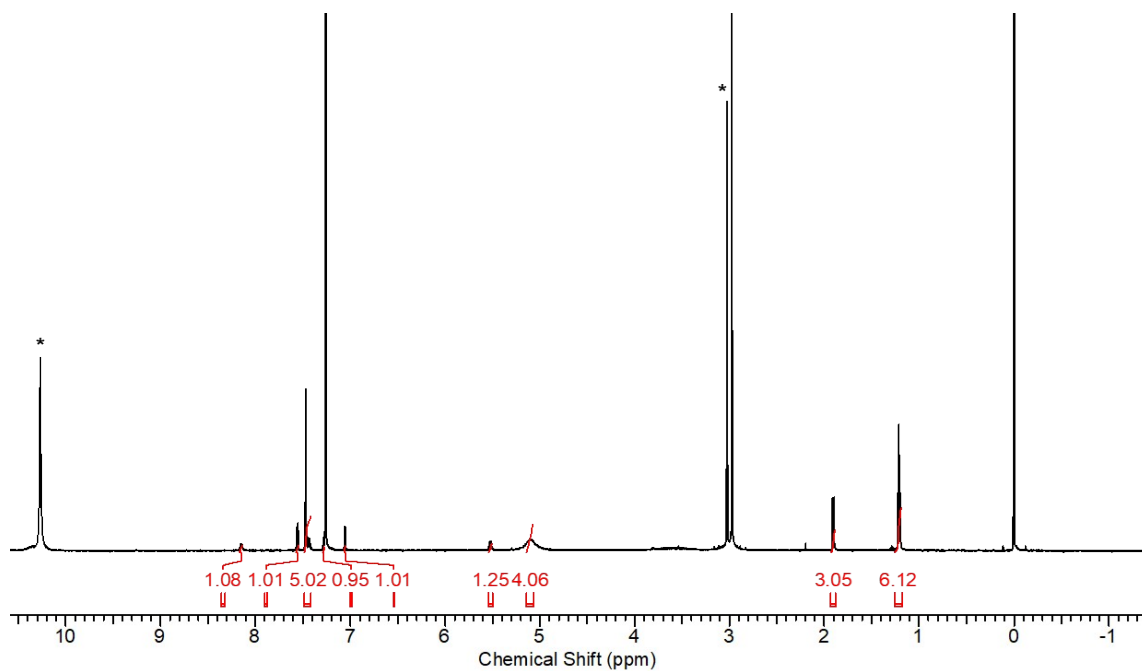

**Fig. S10**  $^1\text{H}$  NMR spectrum of (*S*)-**1a** with  $\text{CH}_3\text{SO}_3\text{H}$  (10 equiv.) in  $\text{CDCl}_3$  (500 MHz,  $2.0 \times 10^{-3}$  M, 298 K). Asterisked peaks correspond to  $\text{CH}_3\text{SO}_3\text{H}$ .

## 5. Computational Details

All calculations were carried out based on DFT with the B3LYP exchange-correlation functional, using the Gaussian 16W program package.<sup>S3</sup> The basis set used was 6-31+G(d,p) for all atoms. Molecular orbitals and their eigenvalues for **1a** and **1b** were estimated using the optimized geometries determined by the DFT calculations using initial geometries obtained from XRD analysis. The singlet–singlet ( $E(S_n)$ ) transition energies were estimated by time-dependent (TD) DFT calculation (B3LYP/6-31+G(d,p)).

**Table S3.** Selected data for excitation energy, major configuration, coefficient, and oscillator strength for **1** (for the geometries optimized in the  $S_0$  state).<sup>[a]</sup>

| Compound       | State | Excitation energy (eV) | Major configuration <sup>[b]</sup> | Coefficient | Oscillator strength |
|----------------|-------|------------------------|------------------------------------|-------------|---------------------|
| (S)- <b>1a</b> | $S_1$ | 3.75 (330 nm)          | HOMO→LUMO                          | 0.695       | 0.7607              |
|                | $S_2$ | 3.80 (326 nm)          | HOMO–1→LUMO                        | 0.693       | 0.0223              |
|                | $S_3$ | 4.49 (276 nm)          | HOMO–2→LUMO                        | 0.700       | 0.0033              |
| (S)- <b>1b</b> | $S_1$ | 3.58 (346 nm)          | HOMO→LUMO                          | 0.695       | 0.0987              |
|                | $S_2$ | 4.15 (299 nm)          | HOMO–1→LUMO                        | 0.687       | 0.0202              |
|                | $S_3$ | 4.33 (286 nm)          | HOMO–2→LUMO                        | 0.704       | 0.0006              |

[a] Estimated by TD-DFT (B3LYP/6-31+G(d,p)) calculations based on the optimized geometries. [b] Molecular orbitals are shown in Fig. 9.

**Table S4.** Selected data for excitation energy, major configuration, coefficient, and oscillator strength for **1** (for the geometries optimized in the  $S_1$  state).<sup>[a]</sup>

| Compound       | State | Excitation energy (eV) | Major configuration <sup>[b]</sup> | Coefficient | Oscillator strength |
|----------------|-------|------------------------|------------------------------------|-------------|---------------------|
| (S)- <b>1a</b> | $S_1$ | 2.98 (416 nm)          | HOMO→LUMO                          | 0.528       | 0.0220              |
| (S)- <b>1b</b> | $S_1$ | 2.96 (419 nm)          | HOMO→LUMO                          | 0.702       | 0.0666              |

[a] Estimated by TD-DFT (B3LYP/6-31+G(d,p)) calculations based on the optimized geometries. [b] Molecular orbitals are shown in Fig. 9.

## 6. Cartesian Coordinates (in Å)

Table S5. Cartesian coordinates (in angstrom) of (S)-1a in S<sub>0</sub> state<sup>[a]</sup>.

| atom | x         | y         | z         |
|------|-----------|-----------|-----------|
| F    | 1.530002  | 2.2622    | -1.538834 |
| F    | 1.285901  | 3.212134  | 0.541792  |
| O    | -0.461483 | 1.910971  | -0.321828 |
| N    | -4.507709 | -0.620875 | -0.503106 |
| N    | 1.680075  | 0.831054  | 0.383342  |
| C    | 5.357076  | -2.361982 | -1.029371 |
| H    | 5.913958  | -3.177435 | -1.481863 |
| C    | 4.712294  | -1.416284 | -1.835218 |
| H    | 4.767994  | -1.493717 | -2.917311 |
| C    | 4.001785  | -0.367349 | -1.253432 |
| H    | 3.499434  | 0.364985  | -1.880503 |
| C    | 3.918566  | -0.243226 | 0.14439   |
| C    | 4.569186  | -1.192497 | 0.941672  |
| H    | 4.534579  | -1.115269 | 2.023627  |
| C    | 5.284299  | -2.246241 | 0.358759  |
| H    | 5.785362  | -2.971226 | 0.994067  |
| C    | 3.130205  | 0.930641  | 0.721695  |
| H    | 3.464533  | 1.833595  | 0.204525  |
| C    | 3.294243  | 1.170709  | 2.227308  |
| H    | 2.726794  | 2.059111  | 2.512798  |
| H    | 4.347343  | 1.335288  | 2.47543   |
| H    | 2.927205  | 0.324028  | 2.817683  |
| C    | -3.162221 | -0.535967 | -0.223486 |
| C    | -2.434197 | -1.68309  | 0.239624  |
| H    | -2.936401 | -2.625379 | 0.407871  |
| C    | -1.083019 | -1.600949 | 0.483673  |
| H    | -0.550041 | -2.482322 | 0.832529  |
| C    | -0.365169 | -0.397282 | 0.297578  |
| C    | -1.080813 | 0.751161  | -0.152293 |
| C    | -2.453048 | 0.673614  | -0.394173 |
| H    | -2.9368   | 1.584477  | -0.717268 |
| C    | -5.253152 | -1.869179 | -0.31482  |
| H    | -4.647605 | -2.706599 | -0.67665  |
| H    | -6.124571 | -1.824146 | -0.974891 |
| C    | -5.258225 | 0.552662  | -0.963539 |
| H    | -6.135498 | 0.18144   | -1.501713 |
| H    | -4.655128 | 1.090261  | -1.702673 |
| C    | -5.70746  | 1.510076  | 0.149625  |
| H    | -6.394715 | 1.016455  | 0.843341  |
| H    | -6.226588 | 2.370622  | -0.286909 |
| H    | -4.855877 | 1.883793  | 0.724859  |
| C    | -5.717333 | -2.134695 | 1.124655  |

|   |           |           |           |
|---|-----------|-----------|-----------|
| H | -6.405802 | -1.357046 | 1.468308  |
| H | -4.872133 | -2.166024 | 1.818411  |
| H | -6.239239 | -3.096958 | 1.177747  |
| C | 1.019208  | -0.280416 | 0.569802  |
| H | 1.560521  | -1.150371 | 0.94277   |
| B | 0.9923    | 2.107235  | -0.254506 |

---

[a] The geometry was optimized by DFT calculation (B3LYP/6-31+G (d,p)).



**Table S6.** Cartesian coordinates (in angstrom) of (*S*)-**1b** in S<sub>0</sub> state<sup>[a]</sup>.

| atom | x         | y         | z         |
|------|-----------|-----------|-----------|
| F    | -0.452173 | 1.966054  | -1.711147 |
| F    | -0.872283 | 2.99229   | 0.305301  |
| O    | -2.319354 | 1.302868  | -0.428238 |
| N    | 0.00646   | 0.737112  | 0.294408  |
| C    | -1.735159 | -0.901751 | 0.300826  |
| C    | -2.671548 | 0.050064  | -0.187643 |
| C    | -3.456976 | -2.612538 | 0.343083  |
| C    | 2.426842  | 0.138678  | 0.142931  |
| C    | -0.394049 | -0.471951 | 0.546249  |
| H    | 0.32107   | -1.185033 | 0.957374  |
| C    | -2.145432 | -2.229482 | 0.559821  |
| H    | -1.414436 | -2.943451 | 0.931371  |
| C    | 1.404769  | 1.17203   | 0.607494  |
| H    | 1.54454   | 2.070339  | 0.00133   |
| C    | -4.005631 | -0.349999 | -0.395271 |
| H    | -4.713713 | 0.384627  | -0.763028 |
| C    | 3.210947  | -0.610352 | 1.028814  |
| H    | 3.117731  | -0.465401 | 2.100298  |
| C    | -4.381545 | -1.659989 | -0.134495 |
| H    | -5.412688 | -1.957265 | -0.304076 |
| C    | 2.590631  | -0.062749 | -1.238459 |
| H    | 1.9876    | 0.515321  | -1.934331 |
| C    | 4.286977  | -1.740465 | -0.825304 |
| H    | 5.006532  | -2.463278 | -1.19862  |
| C    | 1.48843   | 1.58448   | 2.081931  |
| H    | 1.295974  | 0.740427  | 2.752824  |
| H    | 0.746158  | 2.359568  | 2.283276  |
| H    | 2.481389  | 1.985953  | 2.305244  |
| C    | 4.136193  | -1.544794 | 0.547643  |
| H    | 4.739004  | -2.113906 | 1.249579  |
| C    | 3.51007   | -0.994262 | -1.718865 |
| H    | 3.625259  | -1.134176 | -2.789788 |
| B    | -0.941651 | 1.805676  | -0.412965 |
| H    | -3.773572 | -3.631456 | 0.538496  |

[a] The geometry was optimized by DFT calculation (B3LYP/6-31+G(d,p)).

**Table S7.** Cartesian coordinates (in angstrom) of (*S*)-**1a** in S<sub>1</sub> state<sup>[a]</sup>.

| atom | x         | y         | z         |
|------|-----------|-----------|-----------|
| F    | 1.580725  | 2.284039  | -1.507823 |
| F    | 1.153551  | 3.143464  | 0.580888  |
| O    | -0.44401  | 1.773785  | -0.448943 |
| N    | -4.575585 | -0.594605 | -0.554817 |
| N    | 1.718119  | 0.795867  | 0.394698  |
| C    | 5.476875  | -2.256534 | -1.102907 |
| H    | 6.058527  | -3.038713 | -1.582617 |
| C    | 4.759219  | -1.335637 | -1.875497 |
| H    | 4.782849  | -1.399403 | -2.959959 |
| C    | 4.015328  | -0.331043 | -1.25835  |
| H    | 3.453428  | 0.379336  | -1.859109 |
| C    | 3.971647  | -0.222381 | 0.142115  |
| C    | 4.694722  | -1.146685 | 0.904969  |
| H    | 4.688123  | -1.085084 | 1.988429  |
| C    | 5.441741  | -2.158424 | 0.287884  |
| H    | 5.996607  | -2.865104 | 0.899109  |
| C    | 3.144634  | 0.911278  | 0.758499  |
| H    | 3.484067  | 1.83846   | 0.286358  |
| C    | 3.309405  | 1.089424  | 2.276537  |
| H    | 2.73129   | 1.959527  | 2.596404  |
| H    | 4.359649  | 1.254454  | 2.53823   |
| H    | 2.945743  | 0.217133  | 2.829804  |
| C    | -3.235053 | -0.586133 | -0.205536 |
| C    | -2.555015 | -1.662799 | 0.352945  |
| H    | -3.062224 | -2.584031 | 0.604327  |
| C    | -1.155305 | -1.579974 | 0.62538   |
| H    | -0.6874   | -2.459087 | 1.062899  |
| C    | -0.362969 | -0.462975 | 0.389313  |
| C    | -1.040036 | 0.647451  | -0.171934 |
| C    | -2.441854 | 0.590485  | -0.468313 |
| H    | -2.858576 | 1.481042  | -0.91872  |
| C    | -5.351675 | -1.822816 | -0.398078 |
| H    | -4.716385 | -2.66494  | -0.695958 |
| H    | -6.174073 | -1.784395 | -1.119474 |
| C    | -5.286642 | 0.62427   | -0.954286 |
| H    | -6.208848 | 0.300043  | -1.444203 |
| H    | -4.710516 | 1.150554  | -1.723501 |
| C    | -5.626478 | 1.584934  | 0.195306  |
| H    | -6.270926 | 1.105226  | 0.93746   |
| H    | -6.15221  | 2.46186   | -0.198077 |
| H    | -4.724107 | 1.933578  | 0.706834  |
| C    | -5.916608 | -2.062959 | 1.01212   |

|   |           |           |           |
|---|-----------|-----------|-----------|
| H | -6.646152 | -1.293739 | 1.281796  |
| H | -5.126528 | -2.060681 | 1.768126  |
| H | -6.421635 | -3.034486 | 1.047565  |
| C | 1.047847  | -0.349549 | 0.680304  |
| H | 1.595658  | -1.196817 | 1.073454  |
| B | 1.054163  | 2.023806  | -0.241445 |

---

[a] The geometry was optimized by DFT calculation (B3LYP/6-31+G (d,p)).

**Table S8.** Cartesian coordinates (in angstrom) of (*S*)-**1b** in S<sub>1</sub> state<sup>[a]</sup>.

| atom | x         | y         | z         |
|------|-----------|-----------|-----------|
| F    | -0.339577 | 2.006923  | -1.671629 |
| F    | -0.908054 | 2.944192  | 0.353769  |
| O    | -2.256254 | 1.262576  | -0.553889 |
| N    | 0.047533  | 0.726336  | 0.334354  |
| C    | -1.765078 | -0.886353 | 0.371448  |
| C    | -2.655183 | 0.05375   | -0.243197 |
| C    | -3.651626 | -2.49338  | 0.372359  |
| C    | 2.449285  | 0.110588  | 0.152112  |
| C    | -0.394762 | -0.500528 | 0.66405   |
| H    | 0.291363  | -1.220052 | 1.094189  |
| C    | -2.281417 | -2.131381 | 0.66159   |
| H    | -1.641798 | -2.875683 | 1.1291    |
| C    | 1.43047   | 1.127891  | 0.673023  |
| H    | 1.597036  | 2.057113  | 0.120332  |
| C    | -4.00184  | -0.29822  | -0.528576 |
| H    | -4.623172 | 0.457668  | -0.997489 |
| C    | 3.278866  | -0.641109 | 0.992458  |
| H    | 3.22443   | -0.516243 | 2.069137  |
| C    | -4.504511 | -1.581488 | -0.216549 |
| H    | -5.534433 | -1.835228 | -0.44011  |
| C    | 2.559522  | -0.070644 | -1.237116 |
| H    | 1.917403  | 0.506404  | -1.897549 |
| C    | 4.296602  | -1.728325 | -0.919795 |
| H    | 5.010776  | -2.43488  | -1.332959 |
| C    | 1.539113  | 1.460549  | 2.170107  |
| H    | 1.325057  | 0.587899  | 2.795978  |
| H    | 0.816332  | 2.241809  | 2.415906  |
| H    | 2.542434  | 1.825555  | 2.41156   |
| C    | 4.196831  | -1.555631 | 0.460775  |
| H    | 4.834074  | -2.127404 | 1.129764  |
| C    | 3.472856  | -0.979944 | -1.768834 |
| H    | 3.546199  | -1.102332 | -2.845856 |
| B    | -0.836782 | 1.773519  | -0.39032  |
| H    | -3.99058  | -3.491875 | 0.627836  |

[a] The geometry was optimized by DFT calculation (B3LYP/6-31+G(d,p)).

## 7. References

- [S1]. R. Kuroda and Y. Saito, Solid-State Circular Dichroism Spectra of Tris(diamine)cobalt(III) Complexes: Decomposition into E and A<sub>2</sub> Components, *Bull. Chem. Soc. Jpn.*, 1976, **49**, 433–436.
- [S2]. P. A. A. M. Vaz, J. Rocha, A. M. S. Silva and S. Guieu, Aggregation-Induced Emission Enhancement of Chiral Boranils, *New J. Chem.*, 2018, **42**, 18166–18171.
- [S3]. Gaussian 16, Revision C.01, M. J. Frisch, G. W. Trucks, H. B. Schlegel, G. E. Scuseria, M. A. Robb, J. R. Cheeseman, G. Scalmani, V. Barone, G. A. Petersson, H. Nakatsuji, X. Li, M. Caricato, A. V. Marenich, J. Bloino, B. G. Janesko, R. Gomperts, B. Mennucci, H. P. Hratchian, J. V. Ortiz, A. F. Izmaylov, J. L. Sonnenberg, D. Williams-Young, F. Ding, F. Lipparini, F. Egidi, J. Goings, B. Peng, A. Petrone, T. Henderson, D. Ranasinghe, V. G. Zakrzewski, J. Gao, N. Rega, G. Zheng, W. Liang, M. Hada, M. Ehara, K. Toyota, R. Fukuda, J. Hasegawa, M. Ishida, T. Nakajima, Y. Honda, O. Kitao, H. Nakai, T. Vreven, K. Throssell, J. A. Montgomery, Jr., J. E. Peralta, F. Ogliaro, M. J. Bearpark, J. J. Heyd, E. N. Brothers, K. N. Kudin, V. N. Staroverov, T. A. Keith, R. Kobayashi, J. Normand, K. Raghavachari, A. P. Rendell, J. C. Burant, S. S. Iyengar, J. Tomasi, M. Cossi, J. M. Millam, M. Klene, C. Adamo, R. Cammi, J. W. Ochterski, R. L. Martin, K. Morokuma, O. Farkas, J. B. Foresman and D. J. Fox, Gaussian, Inc., Wallingford CT, 2016.
